# Supplementary material for: Bacteria-induced aggregation of bioorthogonal gold nanoparticles for SERS imaging and enhanced photothermal ablation of Gram-positive bacteria
Source: Royal Society of Chemistry journal article supplement (doi:10.1039/c9tb00845d), 2019-01-01
Supplement: c9tb00845d1.pdf [file c9tb00845d1.pdf]

## Electronic Supplementary Information

### Bacteria-induced Aggregation of Bioorthogonal Gold Nanoparticles for SERS Imaging and Enhanced Photothermal Ablation of Gram-positive Bacteria

Huijie Wang, Wenwen Ouyang, Xuerui Zhang, Jing Xue, Xiaoran Lou, Ranran Fan, Xiaonai Zhao, Lianqi Shan and Tingting Jiang\*

School of Life Sciences, Ludong University, Yantai 264025, China.

E-mail: jiangtingting@ldu.edu.cn

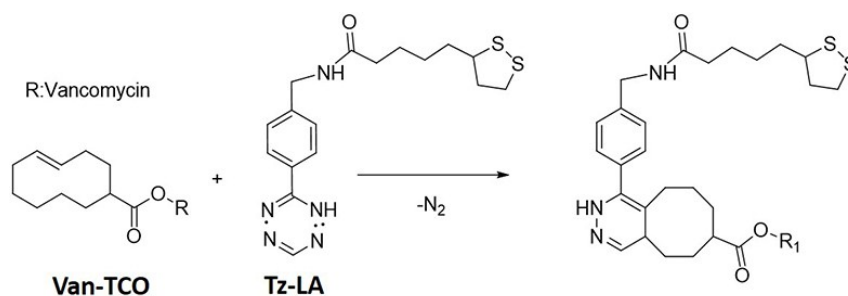

Figure S1. Cycloaddition reaction of trans-cyclooctene derivative of vancomycin (Van-TCO) and tetrazine derivative of liponic acid (Tz-LA)

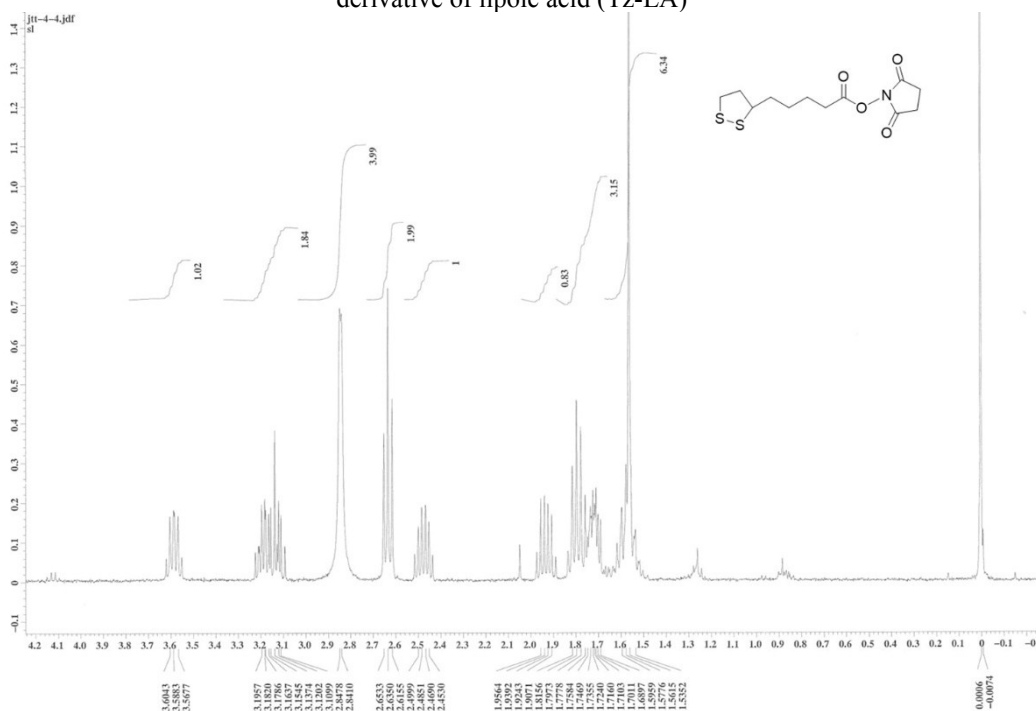

Figure S2. Nuclear magnetic resonance (NMR) data of liponic acid NHS-ester (LA-NHS)

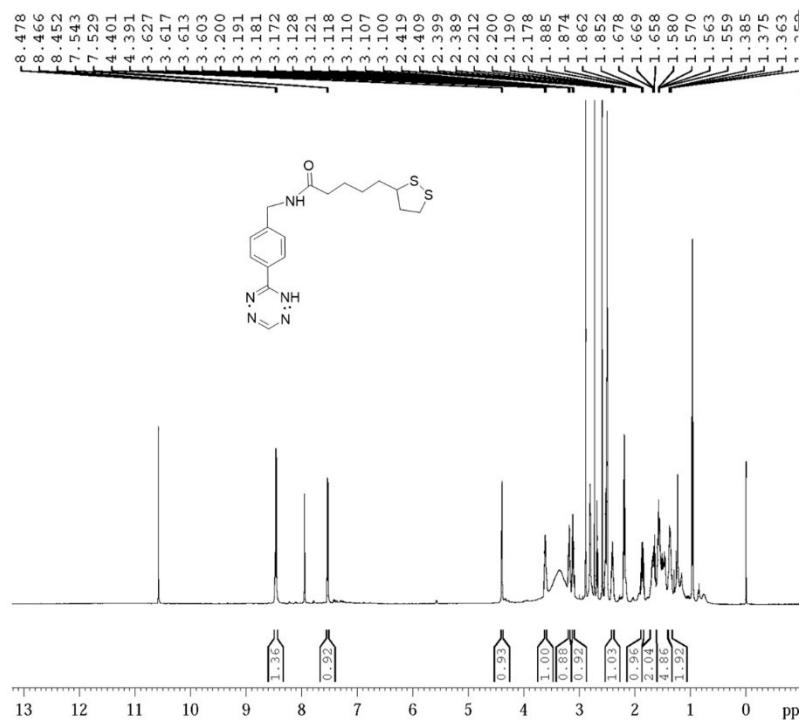

Figure S3. Nuclear magnetic resonance (NMR) data of tetrazin derivative of lipoic acid (Tz-LA)

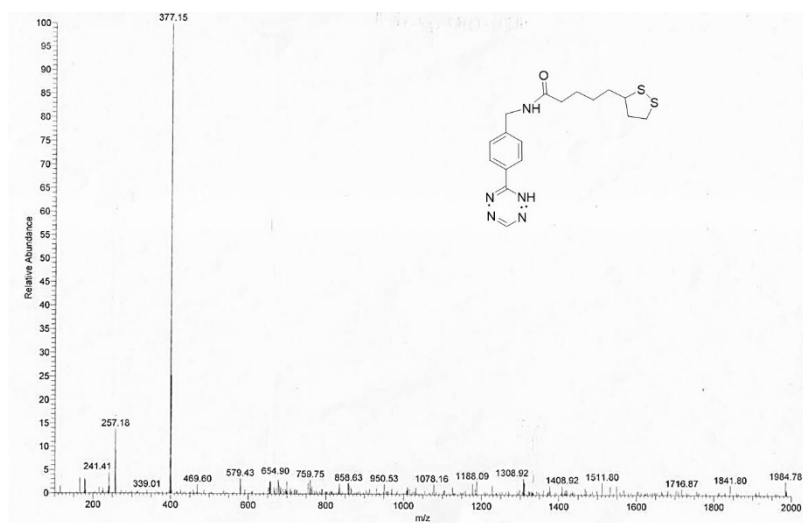

Figure S4. Liquid chromatography-mass spectrometry (LC-MS) data of tetrazin derivative of lipoic acid (Tz-LA)

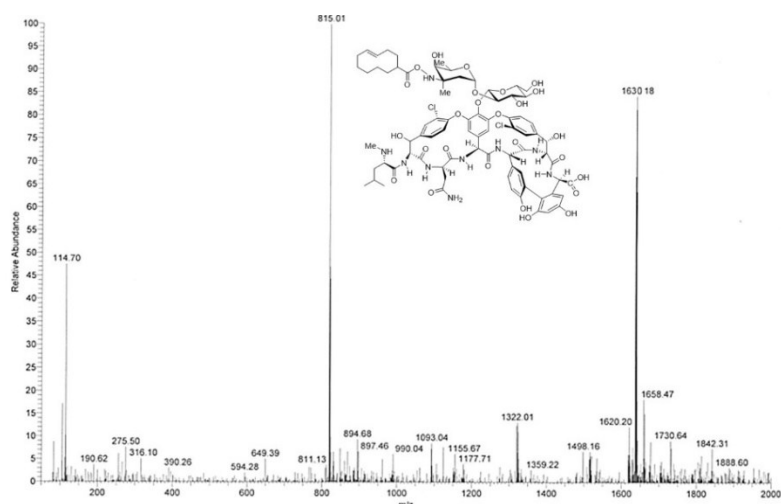

Figure S5 Liquid chromatography-mass spectrometry (LC-MS) data of trans-cyclooctene derivative of vancomycin (Van-TCO)

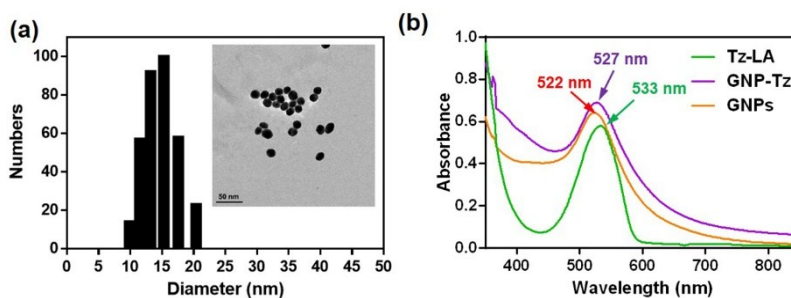

Figure S6. Characterizations of gold nanoparticles using transmission electron microscopy (TEM), dynamic light scattering (DLS) (a) and UV-Vis spectroscopy (b)

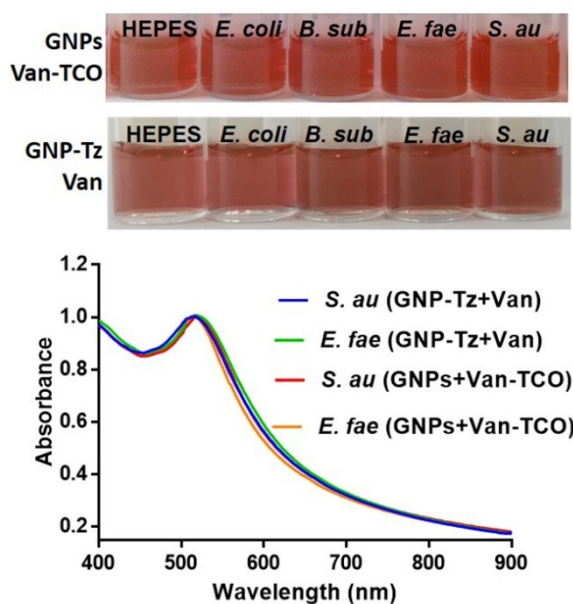

Figure S7. (a) Photographs of various bacterial strains treated with GNPs/Van-TCO and GNP-Tz/Van; (b) UV-vis spectra of two pathogens (*S. au* and *E. fae*) above mentioned.

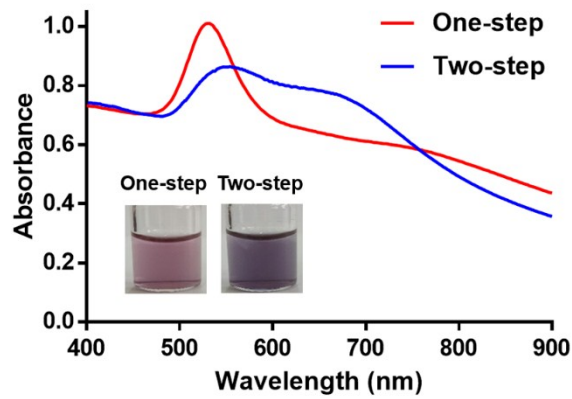

Figure S8. UV-vis spectra of *B. sub* bacterial strain following the two-step cycloaddition labelling method compared to that following the one-step labelling method. The embedding graphs are the digital images of samples above mentioned.

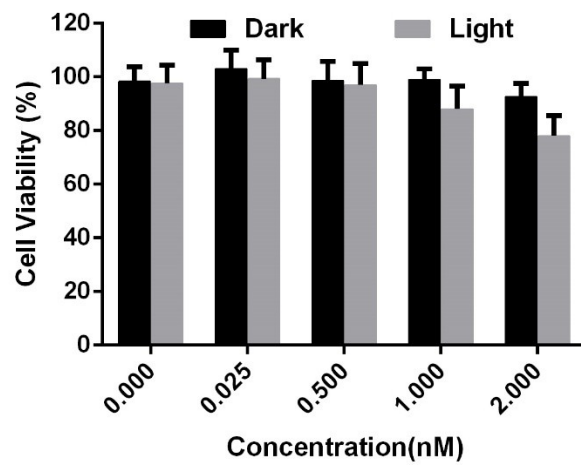

Figure 9. Cytotoxic and photocytotoxic effect of GNP-Tz toward 3T3 fibroblasts cells treated with Van-TCO. The results were mean values  $\pm$  SD of triplicate experiments.

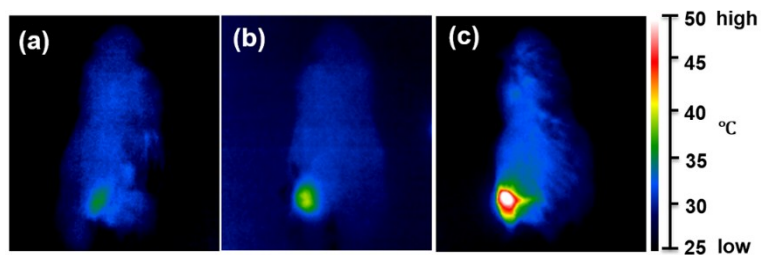

Figure S10. Thermographic images of infection sites treated by Van-TCO (a), GNP-Tz (b) and Van-TCO together with GNP-Tz (c) after NIR light treatment.
